# Supplementary material
Source: publisher figshare collection journal article supplement (https://aacr.figshare.com/articles/dataset/_/22440082)
Supplement: Supplementary file 1 [file 39890944]

# SUPPLEMENTARY FIGURE 1

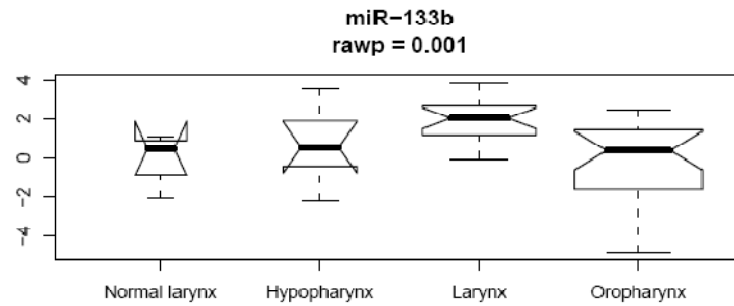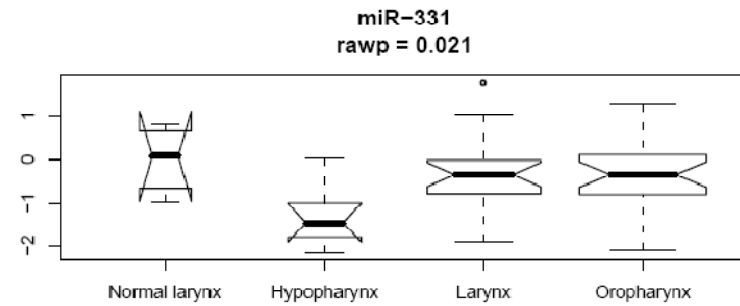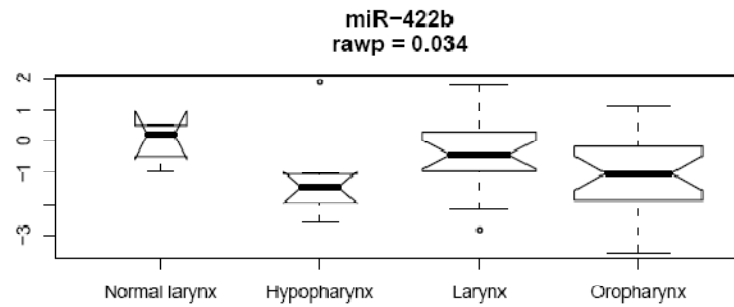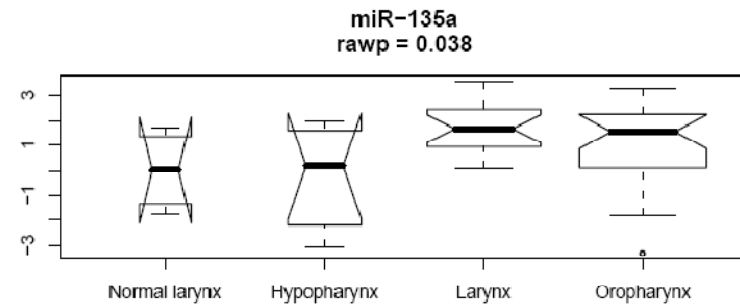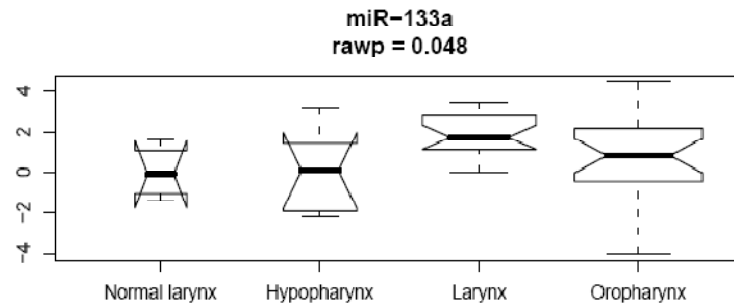

# SUPPLEMENTARY FIGURE 2

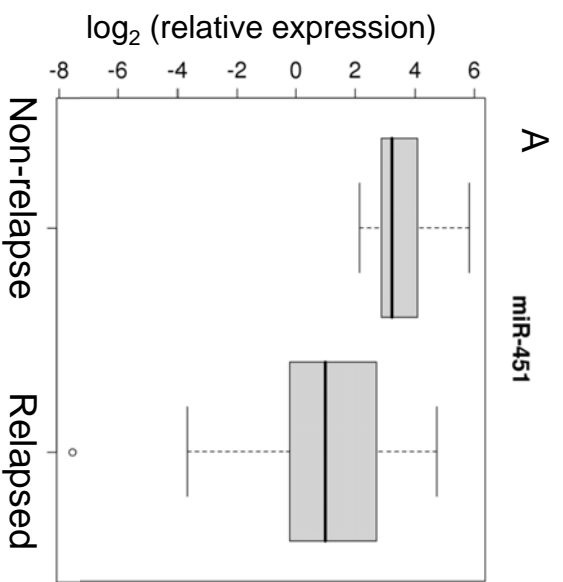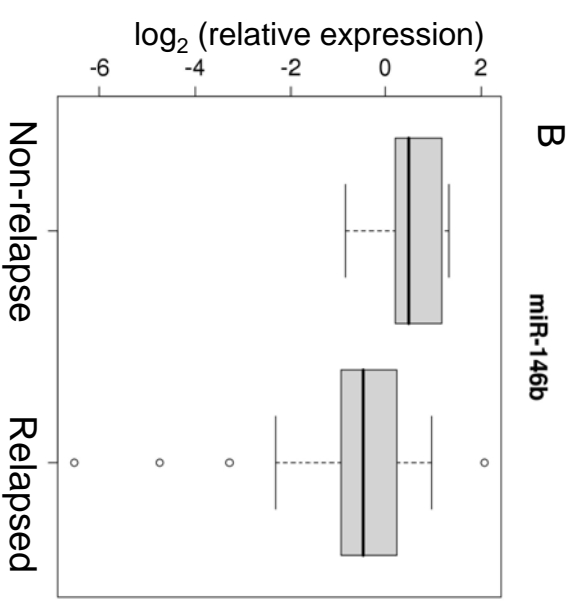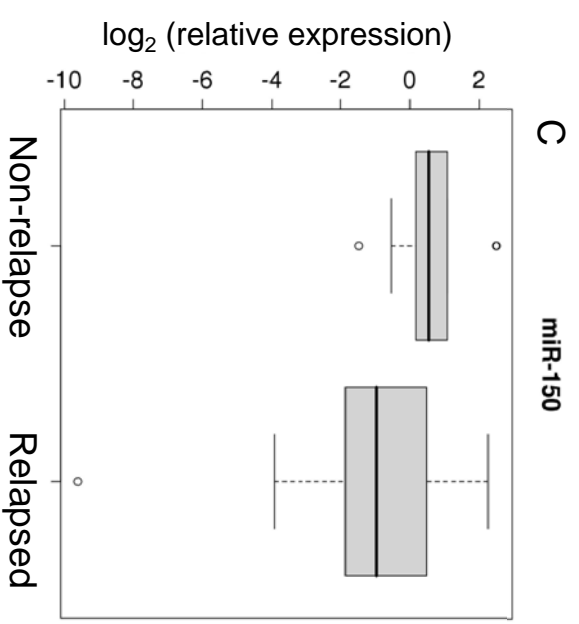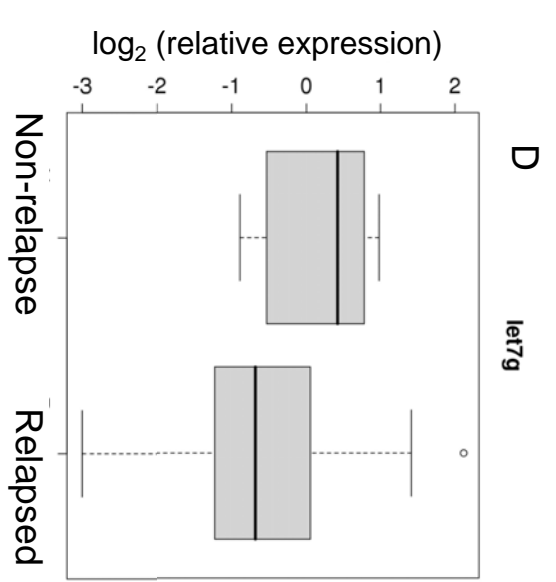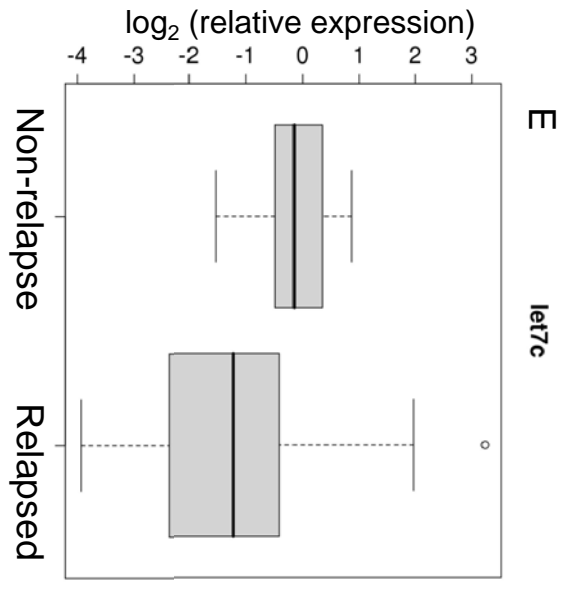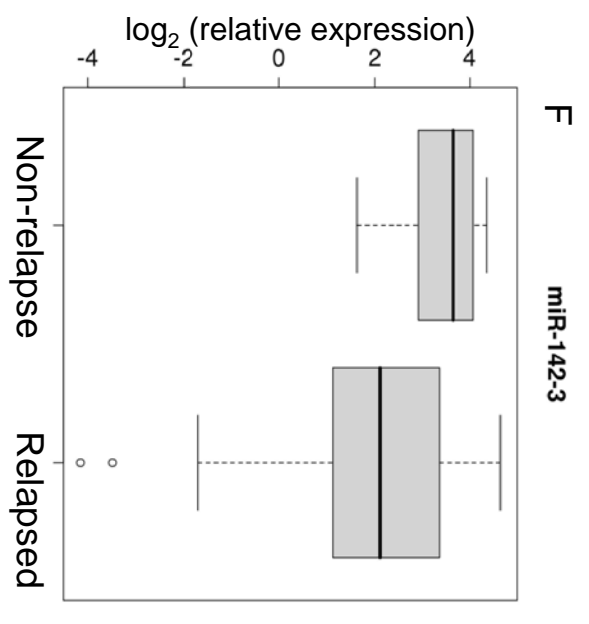

# SUPPLEMENTARY FIGURE 3

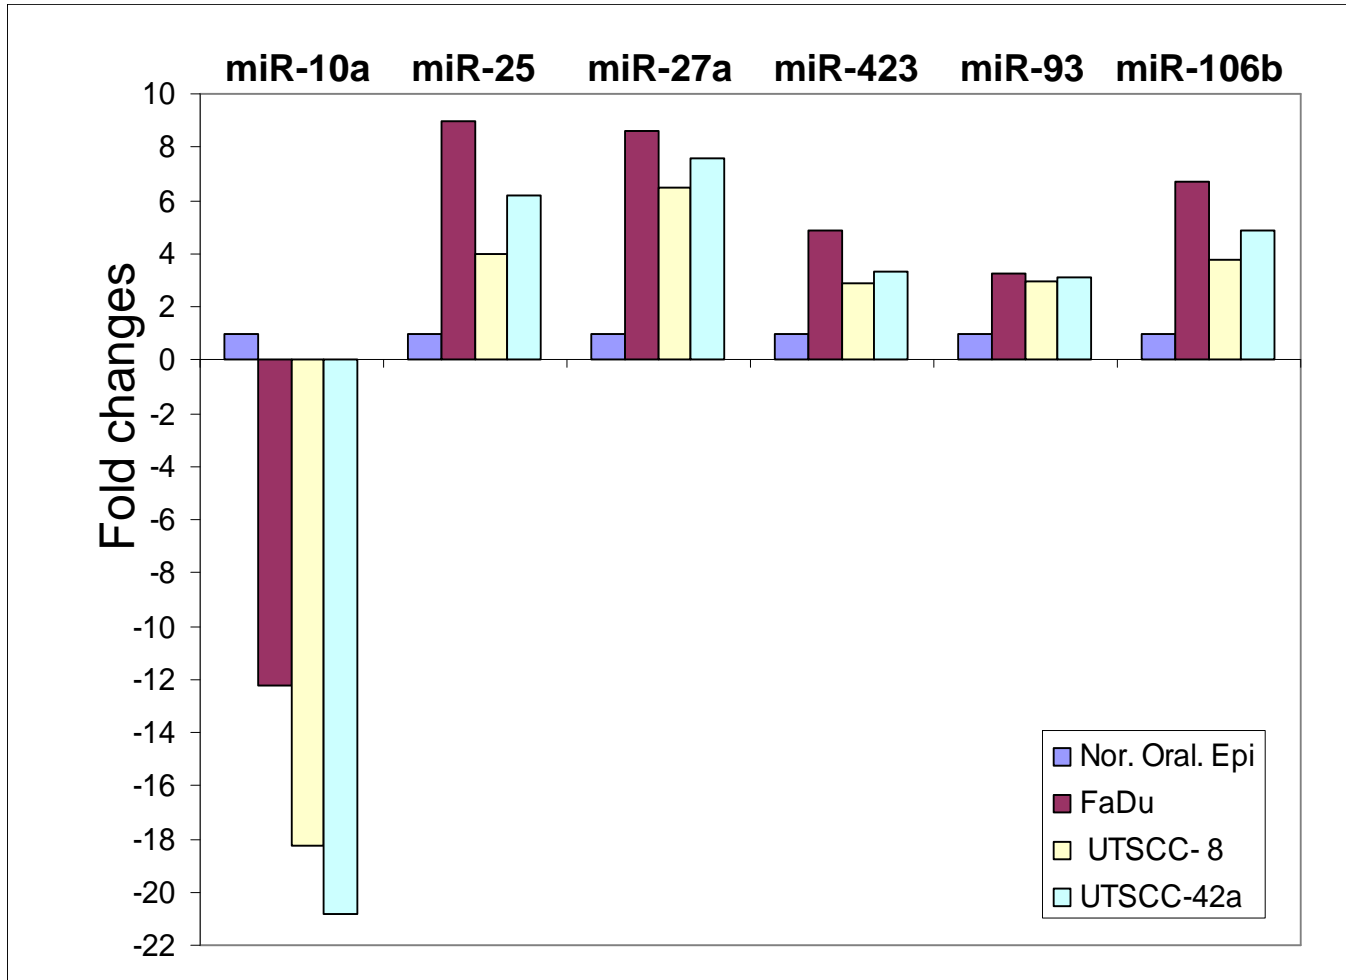

Expression levels of miR-10a, miR-25, miR-27a, miR-423, miR-93, and miR-106b in FaDu, UTSCC-8 and UTSCC-42a cells, relative to that in a normal oral epithelial cell line.

## SUPPLEMENTARY FIGURE 4A

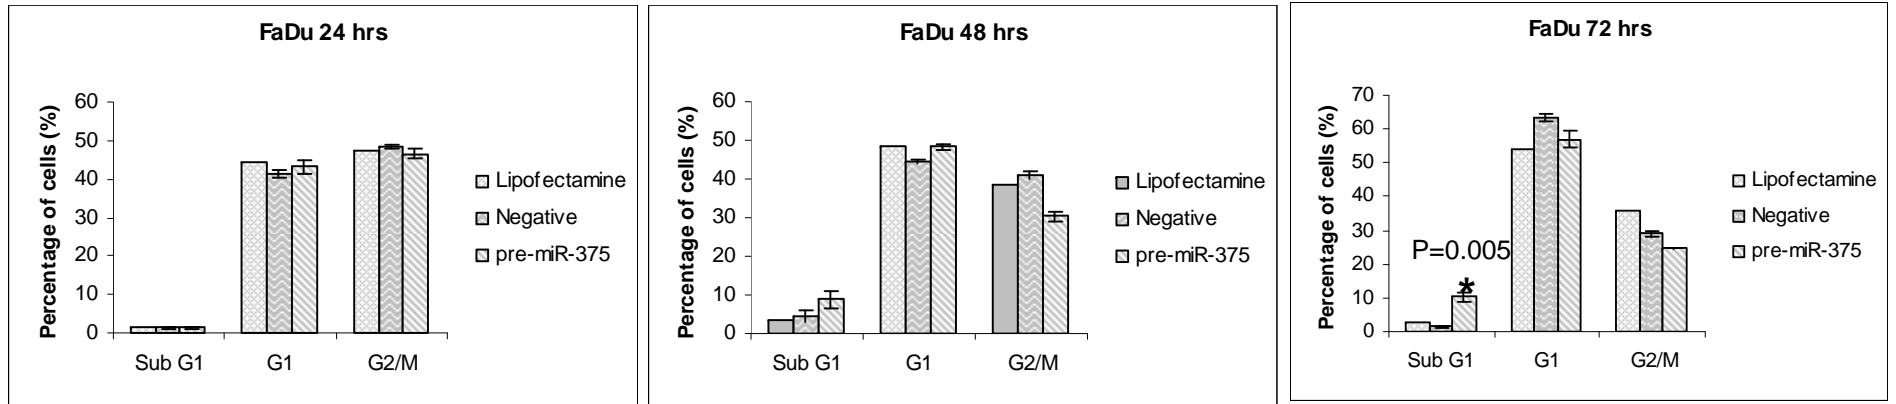

## SUPPLEMENTARY FIGURE 4B

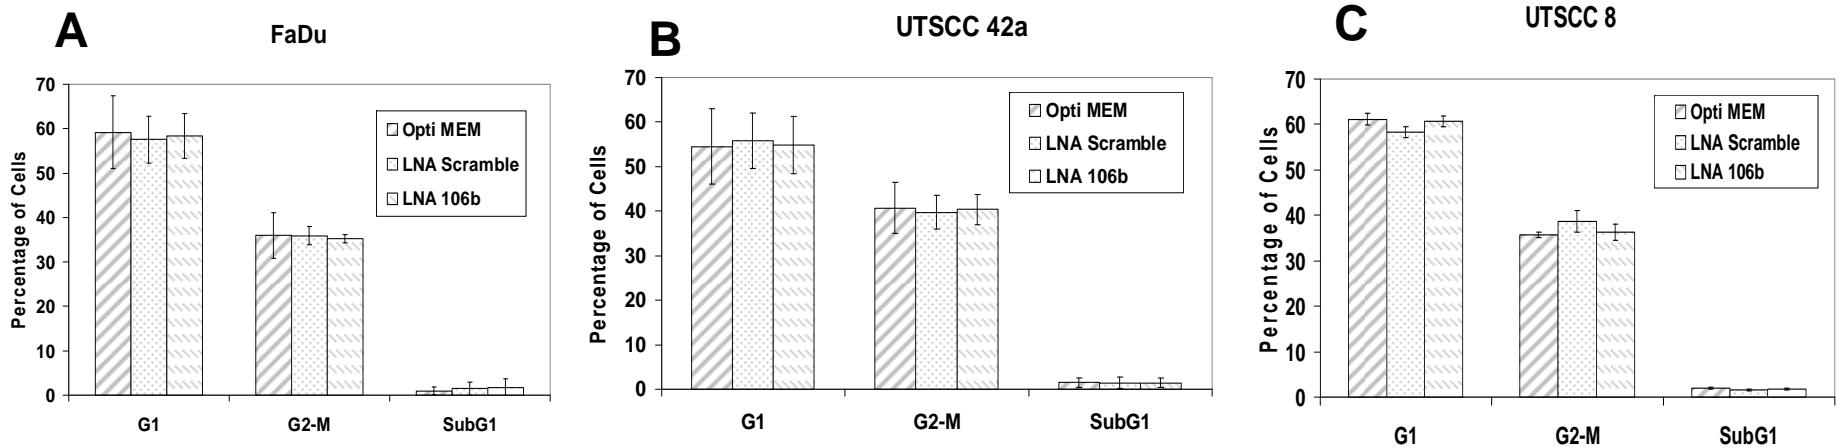

**SUPPLEMENTARY TABLE 1**  
**Clinical Characteristics of Patients**

| <b>Tumor-subsites</b>  |              | <b>Larynx</b> | <b>Oropharynx</b> | <b>Hypopharynx</b> |
|------------------------|--------------|---------------|-------------------|--------------------|
| <b>Number of cases</b> | 54           | 20 (37%)      | 24 (44%)          | 10 (19%)           |
| <b>Gender</b>          | M (44)       | 17 (85%)      | 20 (83%)          | 7 (70%)            |
|                        | F (10)       | 3 (15%)       | 4 (17%)           | 3 (30%)            |
| <b>Age (yrs)</b>       | Median       | 64            | 59                | 62                 |
|                        | Range        | 51-74         | 35-75             | 51-70              |
| <b>Disease Status</b>  | Relapsed     | 15 (75%)      | 19 (79%)          | 10 (100%)          |
|                        | Non-relapsed | 5 (25%)       | 5 (21%)           | 0                  |

**SUPPLEMENTARY TABLE 2**

Differentially expressed miRNAs between HNSCC and normal tissues

|           | rawp | FDR  | mean log2<br>T:N ratio | % of diff.exp | ratio.max |
|-----------|------|------|------------------------|---------------|-----------|
| miR-375   | 0    | 0.12 | -5.03                  | 30            | -1.68     |
| miR-423   | 0    | 0.12 | 2.33                   | 21            | 3.19      |
| miR-93    | 0    | 0.12 | 1.95                   | 26            | 2.94      |
| miR-125b  | 0    | 0.12 | -2.43                  | 27            | -1.22     |
| miR-16    | 0.01 | 0.15 | 1.42                   | 23            | 2.23      |
| miR-20a   | 0.01 | 0.15 | 1.86                   | 27            | 3.02      |
| let-7a    | 0.01 | 0.15 | -1.4                   | 28            | -0.39     |
| miR-106b  | 0.01 | 0.16 | 2.5                    | 29            | 5.41      |
| miR-140   | 0.02 | 0.17 | -2.66                  | 24            | 0.46      |
| miR-10a   | 0.02 | 0.17 | -1.72                  | 27            | -0.14     |
| miR-155   | 0.02 | 0.17 | 1.86                   | 34            | 2.43      |
| miR-25    | 0.02 | 0.17 | 1.42                   | 26            | 2.43      |
| miR-92    | 0.02 | 0.17 | 0.87                   | 23            | 1.45      |
| miR-193a  | 0.02 | 0.18 | 1.78                   | 28            | 3.38      |
| let-7i    | 0.03 | 0.18 | 1.23                   | 23            | 2.23      |
| miR-19b   | 0.03 | 0.18 | 1.52                   | 28            | 3.28      |
| miR-17-5p | 0.03 | 0.18 | 1.87                   | 21            | 3.97      |
| miR-27a   | 0.03 | 0.18 | 1.39                   | 24            | 2.83      |
| miR-99a   | 0.03 | 0.18 | -1.83                  | 26            | -0.39     |
| miR-143   | 0.03 | 0.18 | -1.82                  | 22            | 0.43      |
| miR-100   | 0.03 | 0.18 | -1.64                  | 26            | -0.02     |
| miR-223   | 0.03 | 0.18 | 1.74                   | 27            | 3.37      |
| miR-210   | 0.04 | 0.2  | 1.41                   | 30            | 2.16      |
| miR-142-3 | 0.04 | 0.2  | 2.22                   | 28            | 5.3       |
| miR-106a  | 0.05 | 0.2  | 1.34                   | 26            | 2.78      |
| miR-15a   | 0.05 | 0.2  | 1.35                   | 25            | 2.99      |
| miR-30c   | 0.05 | 0.2  | -1.19                  | 24            | 0.09      |
| miR-21    | 0.05 | 0.22 | 1.88                   | 30            | 4.89      |
| miR-365   | 0.06 | 0.23 | -1.2                   | 26            | 0.21      |
| miR-29b   | 0.06 | 0.24 | 1.11                   | 23            | 2.55      |
| miR-130b  | 0.07 | 0.25 | 1.3                    | 22            | 3.16      |
| miR-127   | 0.07 | 0.26 | -1.33                  | 28            | 0.15      |
| miR-205   | 0.08 | 0.27 | 1.01                   | 31            | 2.92      |
| miR-199b  | 0.08 | 0.27 | -1.17                  | 29            | 0.15      |
| let-7c    | 0.08 | 0.27 | -1.06                  | 26            | -0.22     |
| miR-422b  | 0.08 | 0.27 | 0.9                    | 27            | 1.89      |

|           |      |      |       |    |      |
|-----------|------|------|-------|----|------|
| let-7e    | 0.09 | 0.27 | -0.96 | 25 | 0.32 |
| miR-26a   | 0.09 | 0.27 | -0.91 | 27 | 0.59 |
| miR-324-5 | 0.1  | 0.31 | 1.11  | 0  | 2.17 |
| miR-374   | 0.11 | 0.31 | 1.1   | 0  | 2.83 |
| miR-141   | 0.11 | 0.31 | 1.35  | 0  | 3.96 |
| miR-20b   | 0.12 | 0.31 | 0.91  | 0  | 1.72 |
| miR-505   | 0.12 | 0.31 | -1.11 | 0  | 0.51 |
| miR-451   | 0.12 | 0.31 | 1.39  | 1  | 3.21 |
| miR-135b  | 0.12 | 0.31 | 1.25  | 0  | 4.14 |
| miR-23b   | 0.12 | 0.31 | -1.1  | 0  | 0.84 |
| miR-214   | 0.13 | 0.33 | -1.09 | 1  | 0.08 |
| miR-15b   | 0.14 | 0.34 | 0.75  | 1  | 1.99 |
| miR-130a  | 0.17 | 0.39 | 0.93  | 0  | 3.07 |
| miR-30b   | 0.17 | 0.39 | -0.88 | 1  | 0.37 |
| miR-125a  | 0.17 | 0.39 | -0.65 | 1  | 0.39 |
| miR-135a  | 0.18 | 0.4  | -1.16 | 0  | 1.31 |
| miR-145   | 0.19 | 0.42 | -1.37 | 2  | 2.07 |
| miR-133a  | 0.21 | 0.45 | -0.97 | 0  | 1.03 |
| miR-181b  | 0.21 | 0.45 | 0.53  | 1  | 1.86 |
| miR-10b   | 0.22 | 0.46 | -0.79 | 0  | 2.02 |
| miR-31    | 0.22 | 0.46 | 0.77  | 1  | 1.8  |
| miR-382   | 0.24 | 0.46 | -0.74 | 0  | 0.18 |
| miR-497   | 0.24 | 0.46 | -0.84 | 0  | 0.98 |
| miR-151   | 0.24 | 0.46 | 1.13  | 0  | 4.09 |
| miR-199a# | 0.25 | 0.48 | -1.17 | 3  | 0.85 |
| miR-30a-5 | 0.26 | 0.49 | -0.64 | 1  | 1.02 |
| miR-132   | 0.26 | 0.49 | 0.87  | 0  | 3.19 |
| miR-34c   | 0.29 | 0.53 | -0.88 | 1  | 1.77 |
| miR-486   | 0.29 | 0.53 | 0.9   | 0  | 2.11 |
| miR-222   | 0.31 | 0.53 | -0.78 | 3  | 0.11 |
| miR-133b  | 0.31 | 0.53 | -0.7  | 0  | 1.39 |
| miR-148a  | 0.31 | 0.53 | -1.55 | 0  | 2.11 |
| miR-30d   | 0.32 | 0.54 | -0.7  | 1  | 1.18 |
| let-7g    | 0.32 | 0.54 | -0.47 | 0  | 0.89 |
| miR-142-5 | 0.34 | 0.56 | 0.52  | 0  | 1.37 |
| miR-23a   | 0.36 | 0.56 | -0.51 | 0  | 1.34 |
| miR-30a-3 | 0.36 | 0.56 | -0.83 | 0  | 1.88 |
| miR-342   | 0.36 | 0.56 | -0.46 | 0  | 0.87 |
| miR-331   | 0.37 | 0.58 | 0.49  | 0  | 1.72 |
| miR-28    | 0.39 | 0.59 | 0.38  | 0  | 1.7  |

|           |      |      |       |   |      |
|-----------|------|------|-------|---|------|
| miR-378   | 0.39 | 0.59 | -0.43 | 0 | 0.03 |
| miR-181d  | 0.39 | 0.59 | 0.38  | 0 | 1.24 |
| miR-146a  | 0.41 | 0.6  | 0.4   | 1 | 2.44 |
| miR-218   | 0.43 | 0.6  | -0.67 | 0 | 0.52 |
| miR-182   | 0.43 | 0.6  | 0.73  | 1 | 3.66 |
| let-7d    | 0.43 | 0.6  | 0.34  | 0 | 1.45 |
| miR-150   | 0.43 | 0.6  | -0.74 | 1 | 0.44 |
| miR-361   | 0.45 | 0.61 | -0.28 | 0 | 0.2  |
| let-7b    | 0.45 | 0.61 | -0.25 | 0 | 0.42 |
| miR-99b   | 0.47 | 0.61 | -0.4  | 0 | 0.9  |
| miR-30e-5 | 0.47 | 0.61 | -0.35 | 0 | 1.88 |
| miR-197   | 0.47 | 0.61 | 0.38  | 1 | 1.21 |
| miR-148b  | 0.47 | 0.61 | -0.49 | 0 | 1.63 |
| miR-26b   | 0.53 | 0.69 | -0.55 | 0 | 1.48 |
| miR-221   | 0.55 | 0.7  | 0.18  | 1 | 1.41 |
| miR-429   | 0.55 | 0.7  | 0.09  | 0 | 2.5  |
| miR-191   | 0.57 | 0.7  | -0.83 | 4 | 0.46 |
| miR-224   | 0.57 | 0.7  | 0.32  | 0 | 1.13 |
| miR-24    | 0.57 | 0.7  | 0.28  | 0 | 1.57 |
| miR-34a   | 0.59 | 0.72 | 0.19  | 0 | 3.64 |
| miR-181a  | 0.63 | 0.76 | 0.57  | 0 | 2.66 |
| miR-186   | 0.66 | 0.77 | -0.39 | 2 | 1.23 |
| miR-29a   | 0.66 | 0.77 | -0.3  | 0 | 1.79 |
| miR-200a  | 0.66 | 0.77 | 0.03  | 0 | 3.31 |
| miR-146b  | 0.71 | 0.8  | -0.44 | 1 | 1.69 |
| let-7f    | 0.71 | 0.8  | -0.3  | 0 | 1.22 |
| miR-320   | 0.71 | 0.8  | 0.38  | 0 | 1.45 |
| miR-195   | 0.71 | 0.8  | -0.42 | 1 | 1.94 |
| miR-324-3 | 0.73 | 0.82 | -0.22 | 0 | 1.72 |
| miR-152   | 0.76 | 0.84 | 0.41  | 0 | 3.55 |
| miR-200c  | 0.78 | 0.86 | -0.53 | 4 | 0.7  |
| miR-22    | 0.83 | 0.9  | 0.57  | 0 | 3.87 |
| miR-149   | 0.86 | 0.91 | 0.33  | 0 | 2.11 |
| miR-103   | 0.86 | 0.91 | 0.21  | 0 | 2.14 |
| miR-187   | 0.88 | 0.92 | -0.02 | 0 | 1.48 |
| miR-126#  | 0.88 | 0.92 | 0.12  | 0 | 2.5  |
| miR-203   | 0.91 | 0.94 | 0.01  | 2 | 1.23 |
| miR-29c   | 0.99 | 1    | 0.59  | 0 | 4.78 |
| miR-126   | 0.99 | 1    | -0.04 | 0 | 1.93 |
| miR-30e-3 | 1    | 1    | -0.07 | 0 | 2.61 |



|         |   |   |       |   |      |
|---------|---|---|-------|---|------|
| miR-27b | 1 | 1 | -0.01 | 0 | 2.38 |
|---------|---|---|-------|---|------|

### SUPPLEMENTARY TABLE 3

MiRNAs with differential expression between relapsed vs. non-relapsed patients

| <b>miRNAs</b> | <b>raw p-value</b> | <b>adj p-value</b> | <b>median log2 NR over R ratio</b> |
|---------------|--------------------|--------------------|------------------------------------|
| miR-451       | 0.0009             | 0.107              | 2.23                               |
| miR-146b      | 0.0096             | 0.3564             | 0.96                               |
| miR-150       | 0.0122             | 0.3564             | 1.51                               |
| let7-g        | 0.0165             | 0.3564             | 1.1                                |
| let7-c        | 0.019              | 0.3564             | 1.08                               |
| miR-142-3     | 0.019              | 0.3564             | 1.55                               |
| miR-20b       | 0.022              | 0.3564             | 1.15                               |
| let7-f        | 0.0289             | 0.3564             | 0.86                               |
| miR-19b       | 0.0289             | 0.3564             | 0.77                               |
| miR-142-5     | 0.0353             | 0.3564             | 0.95                               |
| miR-29a       | 0.0376             | 0.3564             | 0.83                               |
| miR-99b       | 0.0376             | 0.3564             | -0.74                              |
| miR-200a      | 0.0401             | 0.3564             | 0.58                               |
| miR-26b       | 0.0427             | 0.3564             | 0.7                                |
